# Supplementary material for: Maximizing carbon sequestration potential in Chinese forests through optimal management
Source: PubMed Central journal article supplement (PMC11009231; doi:10.1038/s41467-024-47143-5), 2024-04-11
Supplement: 41467_2024_47143_MOESM1_ESM.pdf [file 41467_2024_47143_MOESM1_ESM.pdf]

1 **Supporting Information for**

2 **Maximizing carbon sequestration potential in Chinese forests through optimal**  
3 **management**

4  
5 Zhen Yu<sup>1,2\*</sup>, Shirong Liu<sup>2\*</sup>, Haikui Li<sup>3</sup>, Jingjing Liang<sup>4</sup>, Weiguo Liu<sup>5</sup>, Shilong Piao<sup>6</sup>, Hanqin  
6 Tian<sup>7</sup>, Guoyi Zhou<sup>1</sup>, Chaoqun Lu<sup>8</sup>, Weibin You<sup>9</sup>, Pengsen Sun<sup>2</sup>, Yanli Dong<sup>1</sup>, Stephen Sitch<sup>10</sup>,  
7 Evgenios Agathokleous<sup>1</sup>

8  
9 **Affiliations:**

10 <sup>1</sup>Key Laboratory of Ecosystem Carbon Source and Sink, China Meteorological Administration  
11 (ECSS-CMA), School of Ecology and Applied Meteorology, Nanjing University of Information  
12 Science and Technology, Nanjing, 210044, China.

13 <sup>2</sup>Key Laboratory of Forest Ecology and Environment, China's National Forestry and Grassland  
14 Administration, Ecology and Nature Conservation Institute, Chinese Academy of Forestry,  
15 Beijing, 100091, China.

16 <sup>3</sup>Key Laboratory of Forest Management and Growth Modelling, China's National Forestry and  
17 Grassland Administration, Research Institute of Forest Resource Information Techniques,  
18 Chinese Academy of Forestry, Beijing, 100091, China

19 <sup>4</sup>Forest Advanced Computing and Artificial Intelligence Laboratory (FACAI), Department of  
20 Forestry and Natural Resources, Purdue University, West Lafayette, IN, 47907, USA.

21 <sup>5</sup>College of Forestry, Northwest agriculture and Forestry University, Yangling, 712100, China.

22 <sup>6</sup>Sino-French Institute for Earth System Science, College of Urban and Environmental Sciences,  
23 Peking University, Beijing, 100871, China.

24 <sup>7</sup>Schiller Institute for Integrated Science and Society, Department of Earth and Environmental  
25 Sciences, Boston College, Chestnut Hill, MA, 02467, USA.

26 <sup>8</sup>Department of Ecology, Evolution, and Organismal Biology, Iowa State University, Ames, IA,  
27 50011, USA.

28 <sup>9</sup>College of Forestry, Fujian Agriculture and Forestry University, Fuzhou, 350002, China.

29 <sup>10</sup>College of Life and Environmental Sciences, University of Exeter, Exeter, UK

30 \*Corresponding author. Email: [zyu@nuist.edu.cn](mailto:zyu@nuist.edu.cn); [liusr@caf.ac.cn](mailto:liusr@caf.ac.cn)

31

32 **This PDF file includes:**

33

34 Supporting text

35 Figures S1 to S18

36 Tables S1 to S9

37 SI References

38

39 **Supporting Information Text**

40 **Spatial distribution of the forest plots surveyed during national forest inventory**

41 About 415, 000 permanent plots were set up in China for routine survey each five years. Among  
42 these plots, nearly 30,000 to 50,000 surveyed plots were covered with trees during the period of  
43 the 6<sup>th</sup> (1999-2003) to 9<sup>th</sup> NFI (2014-2018) (Figure S1). For each forest plot, trees with diameter  
44 at breast height (DBH)  $\geq$  5cm were labeled, measured, and recorded. In total of 18,116,071 tree  
45 were recorded, and the tree volume was calculated by referring to the one-variable tree volume  
46 tables for each species specifically developed in each province (Ministry of Agriculture and  
47 Forestry of China, 1978). The stand volumes were summarized to plot level from all recorded  
48 trees.

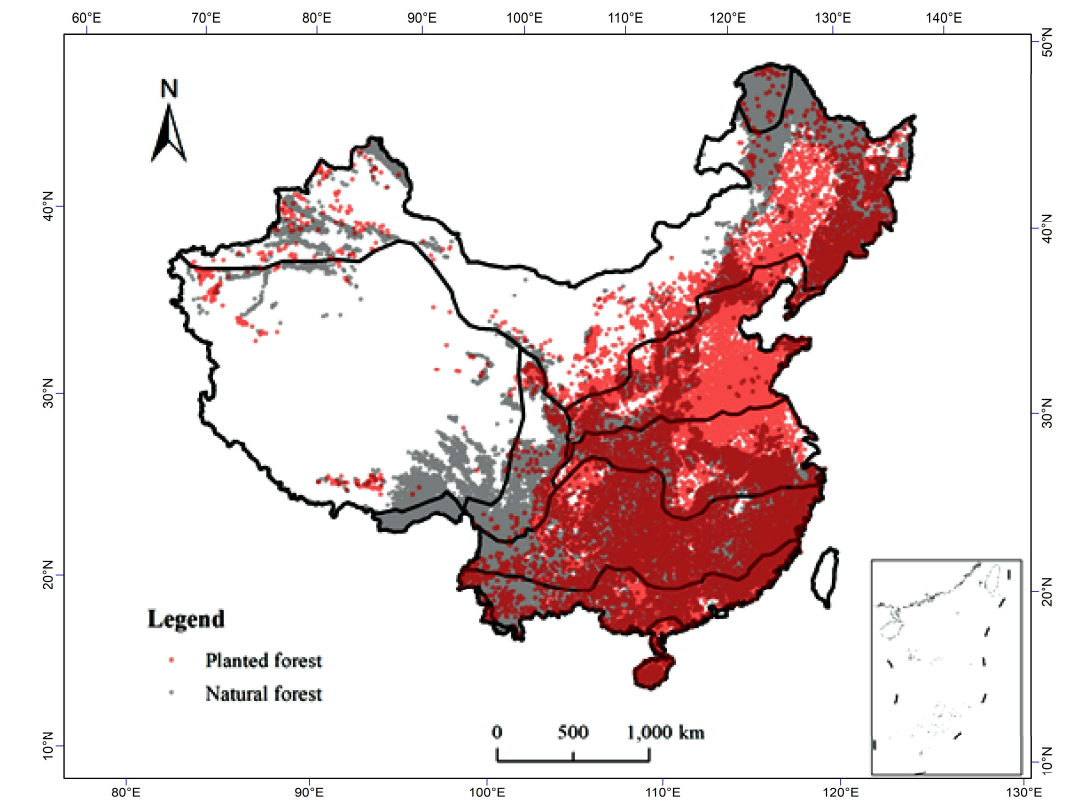

49

50 **Fig. S1. Locations of the national forest inventory plots in China. Red and gray dots indicate**  
51 **plots of planted and natural forests.**

52

53

54 **Forest carbon stock and age**

55 We converted the tree volume data into biomass carbon stock using the continuous biomass  
56 expansion factor method (Table S1) and the species-specific carbon conversion parameters  
57 (Tables S2). We examined the biomass carbon stock changes with stand age in natural and  
58 planted forests (Figure S2). As expected, forest carbon stocks increase with stand age but  
59 saturate as they proceed to mature (Figures S2A-C). The relationships of forest biomass carbon  
60 and age were used to estimate the species-specific carbon stock in 2018, which serve as the  
61 reference for calibration and validation of the simulations using process-based model (DLEM).  
62 Besides, the age and biomass carbon for each major tree species were showed in Figure S3.

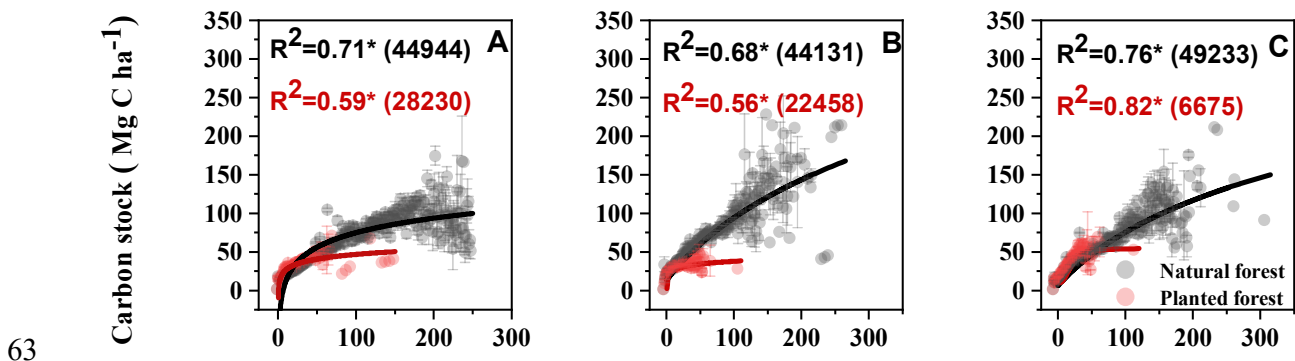

64 **Fig. S2. Relationships between forest biomass carbon accumulations and ages.** Panels A-C:  
65 relationships of forest stock volume and stand age; error bars indicate 1 standard error from the  
66 mean; \* indicate significant at  $p < 0.05$  level.

67

68 The age and biomass carbon relationship of different tree species in needle-leaf forests

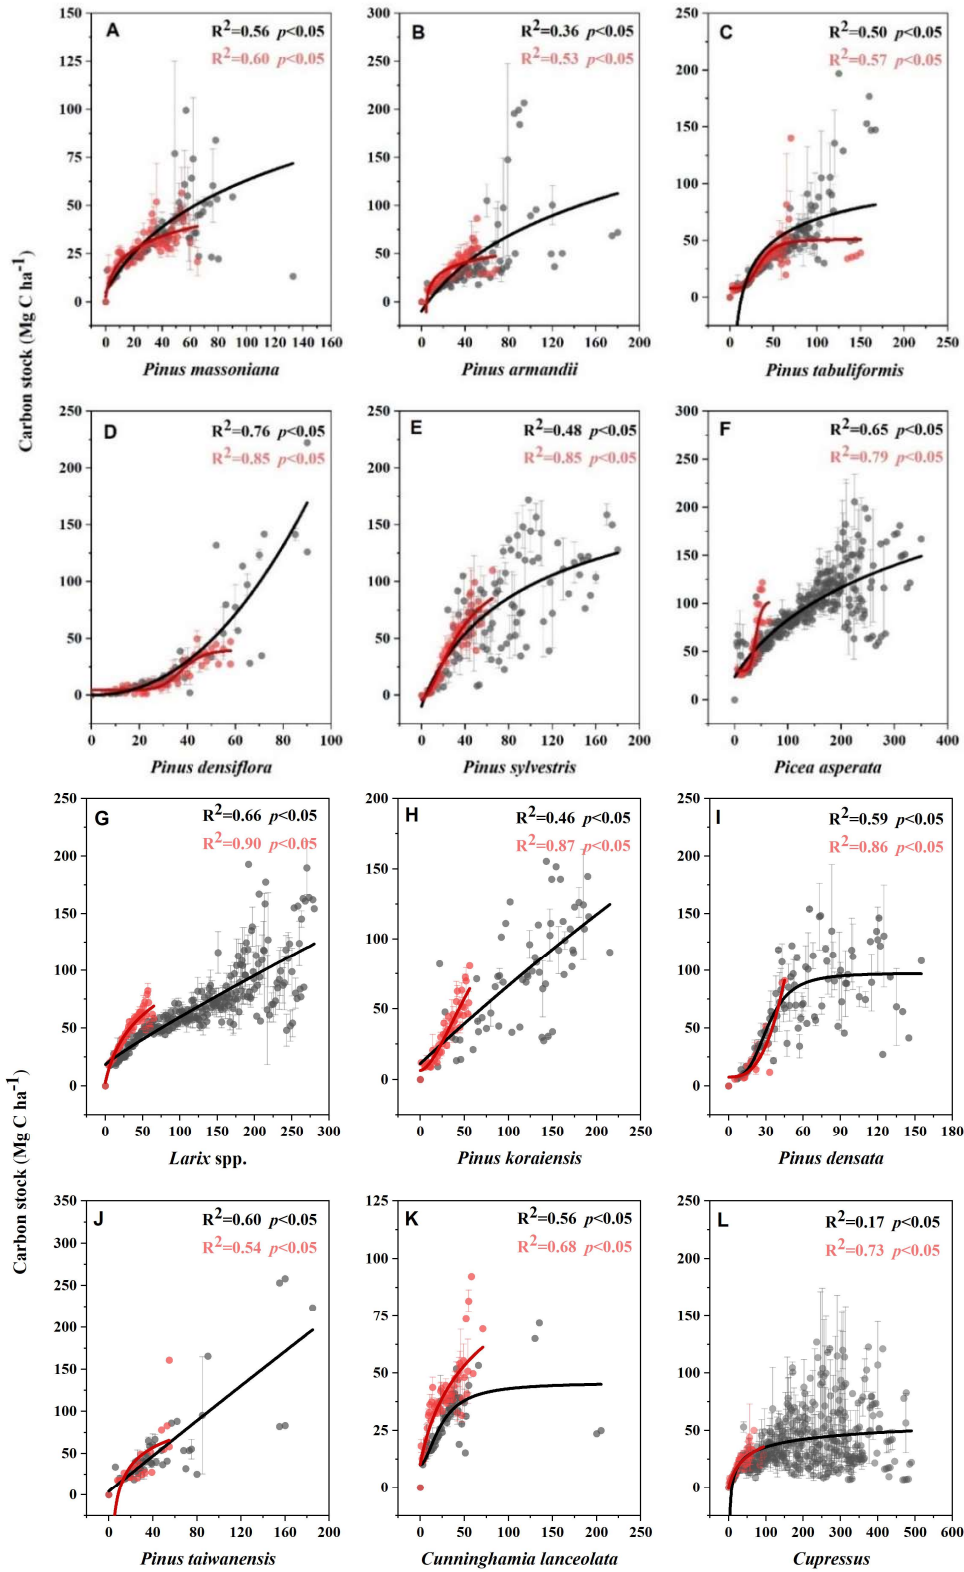

69

70

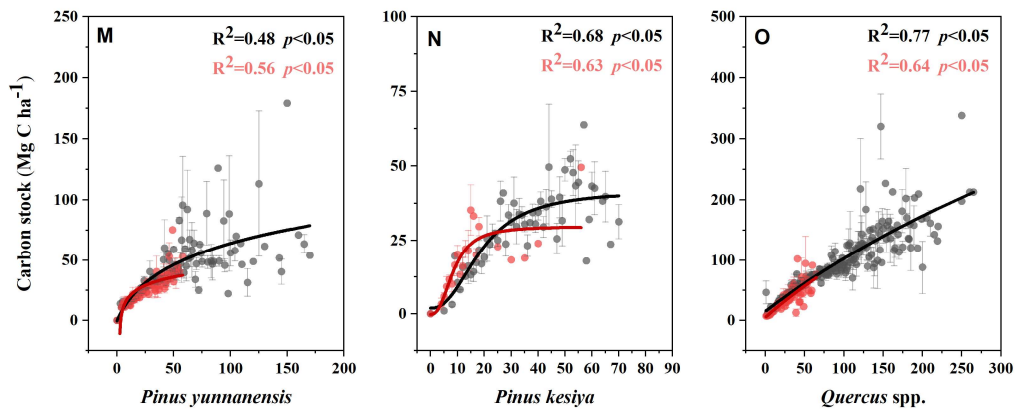

71

72 **Fig. S3. The age and biomass carbon relationship of different needle-leaf tree species**  
 73 **derived from the 6<sup>th</sup> to 9<sup>th</sup> national forest inventory data.** Panels A-O indicate *Pinus*  
 74 *massoniana*, *Pinus armandii*, *Pinus tabuliformis*, *Pinus densiflora*, *Pinus sylvestris*, *Picea*  
 75 *asperata*, *Larix* spp., *Pinus koraiensis*, *Pinus densata*, *Pinus taiwanensis*, *Cunninghamia*  
 76 *lanceolata*, *Cupressis*, *Pinus yunnanensis*, *Pinus kesiya*, and *Quercus* spp., respectively. Error  
 77 bars indicate the standard error of means.

78

79 The age and biomass carbon relationship of different tree species in broadleaf forests

80

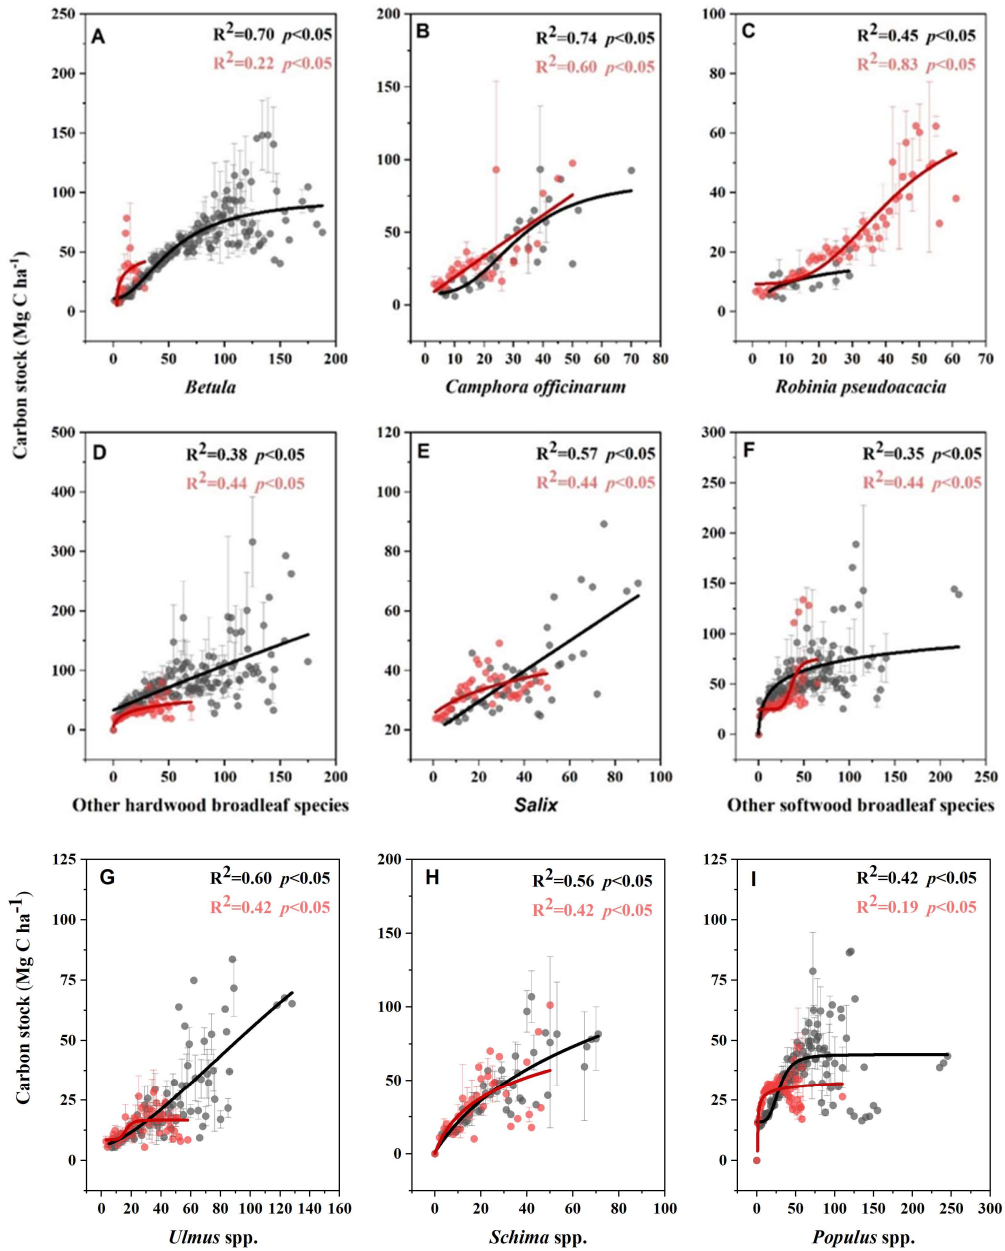

81

82

83 Fig. S4. The age and biomass carbon relationship of different broadleaf tree species derived

84 from the 6<sup>th</sup> to 9<sup>th</sup> national forest inventory data. Panels A-I indicate *Betula*, *Camphora*

85 *officinarum*, *Robinia Pseudoacacia*, Other hardwood broadleaf species, *Salix*, Other softwood

86 broadleaf species, *Ulmus spp.*, *Schima spp.*, and *Populus spp.*, respectively. Error bars indicate

87 the standard error of means.

88

89 **The age and biomass carbon relationship in mixed forests**

90

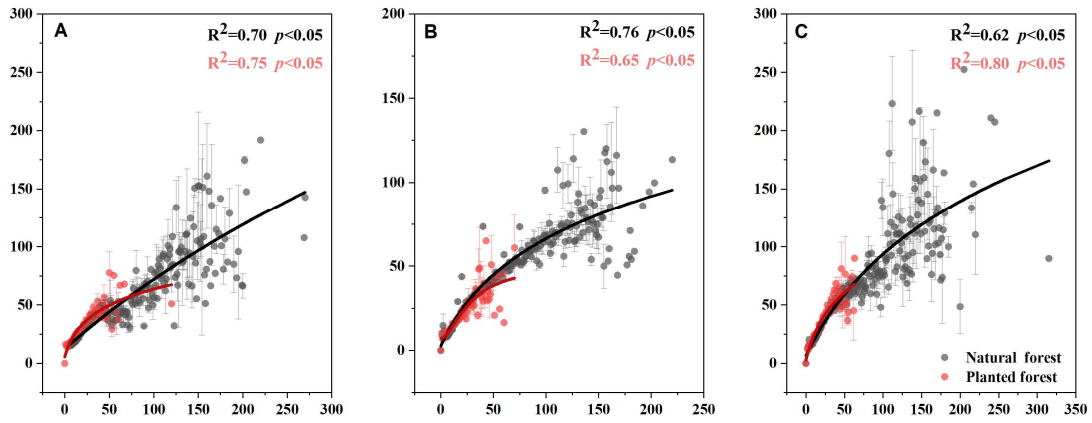

91

92 **Fig. S5. The age and biomass carbon relationship of different mixed forests derived from**

93 **the 6<sup>th</sup> to 9<sup>th</sup> national forest inventory data.** Panel A-C indicate need-leaf mixed forests,

94 broadleaf mixed forests, and need-leaf and broadleaf mixed forest, respectively. Error bars

95 indicate the standard error of means.

96



97 **Forest carbon stock and sink calibration and validation at species level**

98 We compared the forest carbon stock derived from inventory data and process-based  
 99 biogeochemical model (DLEM) for each species of natural forest and planted forest (Figure S6).  
 100 We further compared the forest carbon sink in 2020 derived from inventory data and process-  
 101 based biogeochemical model for each tree species (Figure S14). Specifically, the sink of the no  
 102 harvesting scenario from the process-based model was compared with the results derived from  
 103 the statistical model. We also compared the temporal changes in forest biomass carbon sink  
 104 derived from statistical model and the process-based biogeochemical model under no harvesting  
 105 scenario (Figure S7).

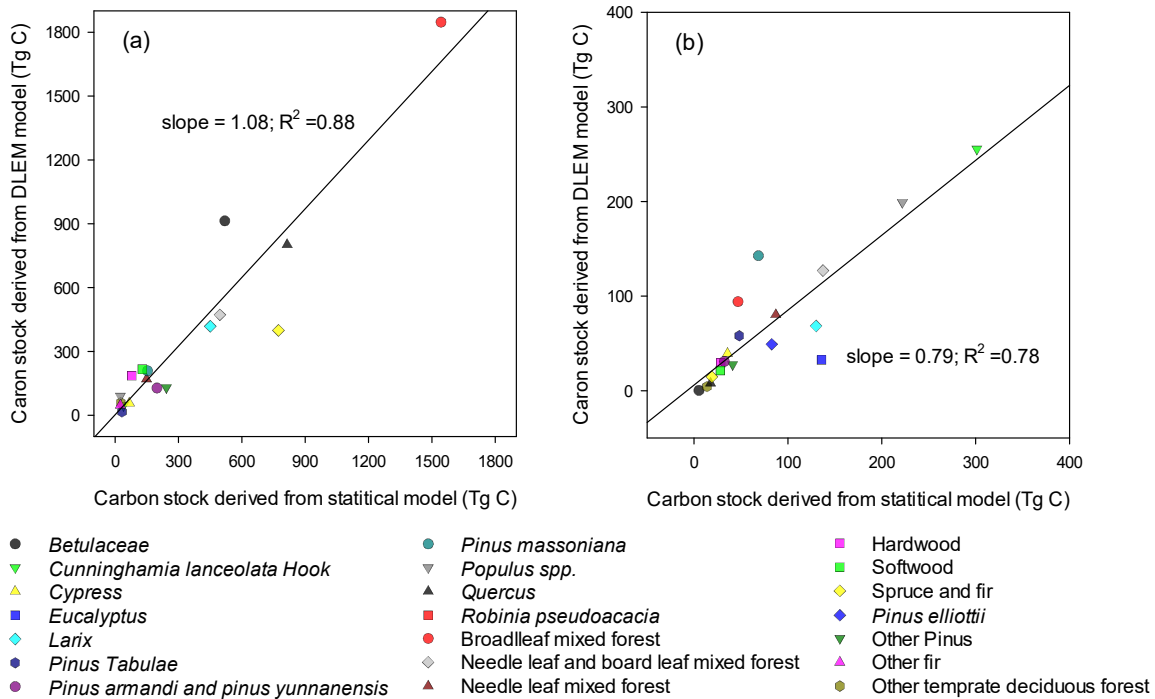

106

107 **Fig. S6. Comparison of carbon stock derived from statistical model and process-based**  
 108 **model at species level in 2018. Panel a: natural forest; Panel b: planted forest.**

109

110 **Comparison of carbon sink derived from statistical and process-based model with**  
111 **exclusion of wood harvest**

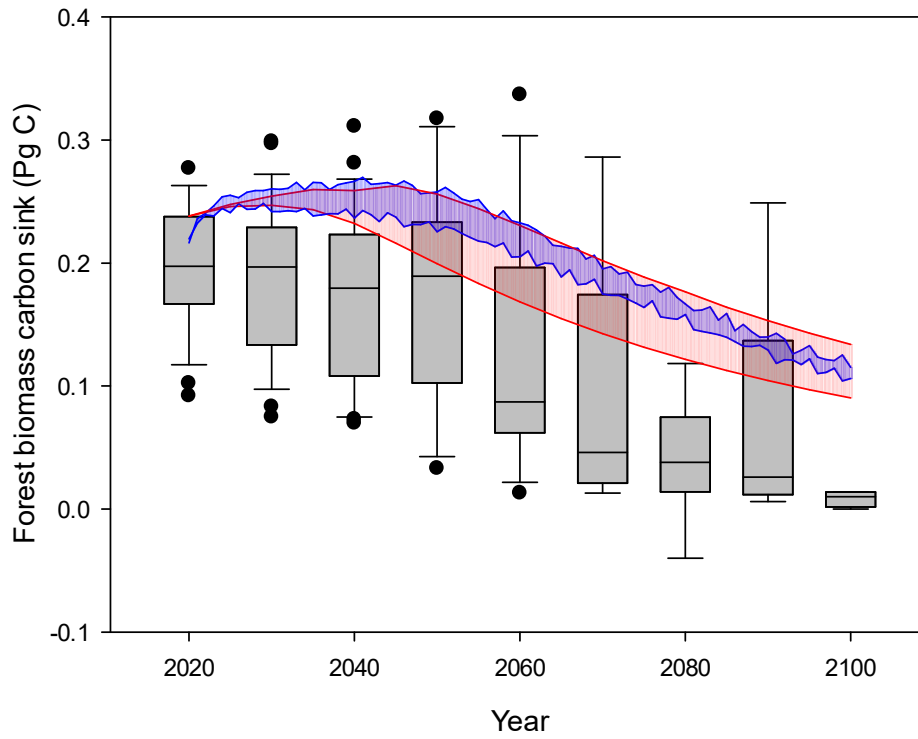

112  
113 **Fig. S7. Comparison of carbon sinks derived from projections with exclusion of wood**  
114 **harvest.** Red shaded area indicates the carbon sink derived from statistical model; blue shaded  
115 area indicates the carbon sink derived from process-based model (DLEM) with exclusion of  
116 wood harvest, climate change, and rising CO<sub>2</sub>; boxes indicate the carbon sinks reported in other  
117 studies. Results of DLEM simulations were derived from group 3 experiments.

118  
119

120 **Peak year of the forest biomass carbon sink under different SSPs**

121

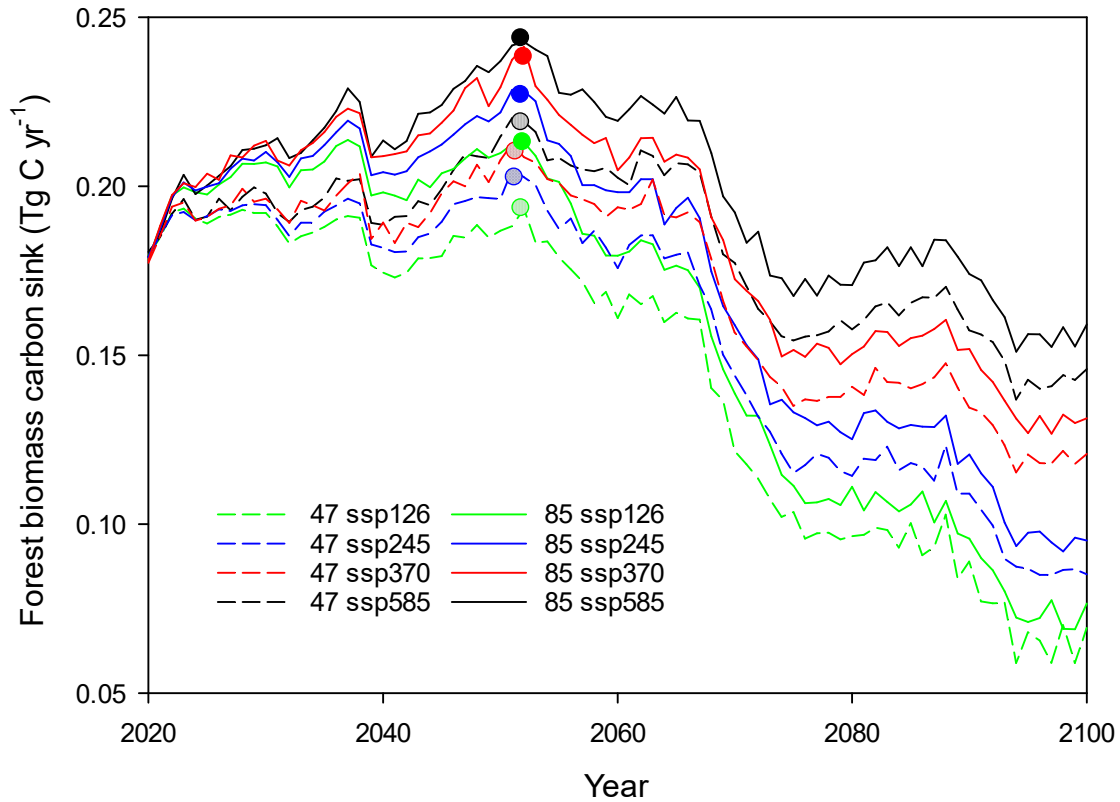

122

123 **Fig. S8. The modeled biomass carbon sink and the year of sink peak under different**  
124 **scenarios.** Dash line and solid line indicate the carbon sink under the scenarios of current tree  
125 survival rate (47%) and elevated tree survival rate (85%); ssp126, ssp245, ssp370, and ssp585  
126 indicate simulation of climate and CO<sub>2</sub> under the scenarios of SSP1-2.6, SSP2-4.5, SSP3-7.0,  
127 and SSP5-8.5; Dotted circle and closed circle indicate the biomass carbon sink peak under the  
128 scenarios of current tree survival rate (47%) and elevated tree survival rate (85%), respectively.  
129 Results were derived from group 1 experiments.

130

131 **Diagram showing forest age change and age impacts on carbon accumulation**

132 Stand age is the average age of trees at canopy level, but average age was derived from all trees  
 133 in the plot (Figure S9). Generally, stand age was more widely used in statistical model, while  
 134 process-based models rely on average age. However, process-based model using average age  
 135 may cause bias in representing the growth rate (Figure 4). For example, Cohort1 and Cohort2 in  
 136 Figure 4 indicate a young age plot and an aged plot, in which the carbon accumulation rate  $F_{ave}$   
 137 (instantaneous growth rate, the first-order derivative of the growth curve) at the average age is  
 138 high, but in reality, the average growth rate (average of  $F_1$  and  $F_2$ ) is very low. Thus, age  
 139 dynamics should be particularly tracked in modeling of tree growth.

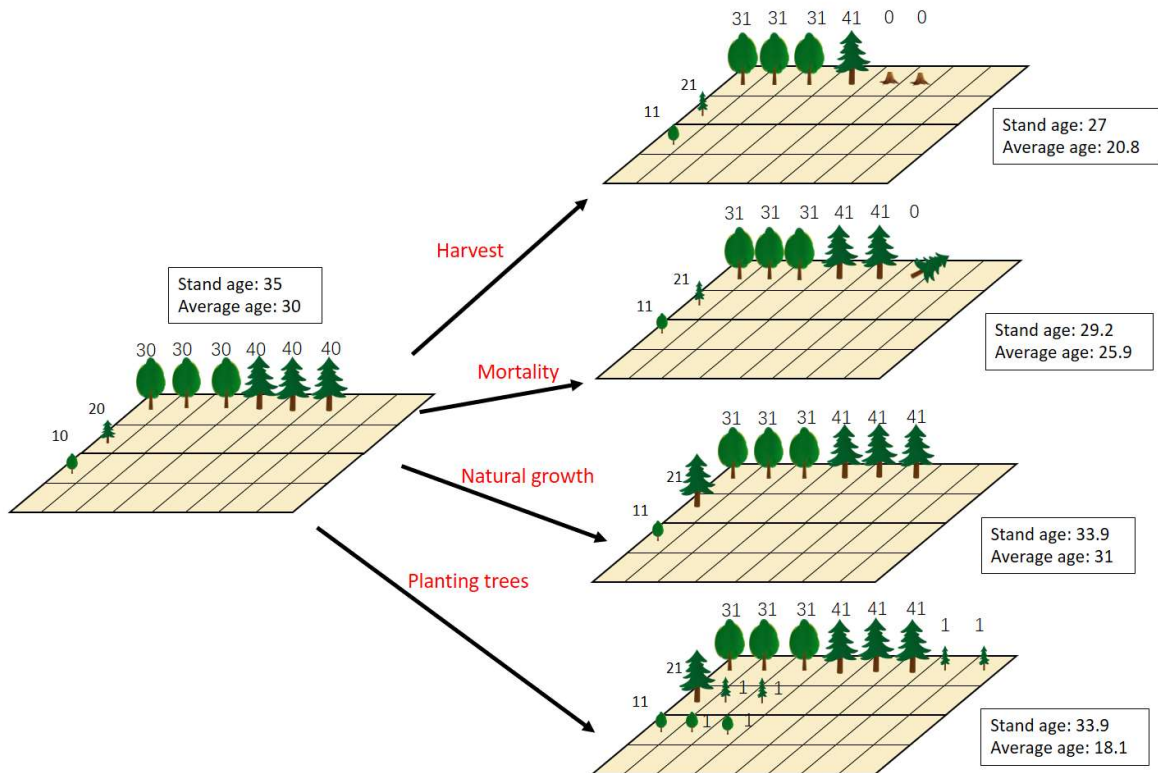

140

141 **Fig. S9. The dynamic of the stand age and average age in a plot due to wood harvest,**  
 142 **mortality, natural growth, and tree-planting.** Stand age: average age of the trees in the  
 143 overstory level; average age: averaged age of all trees in the plot. The numbers above trees  
 144 indicate the tree ages in the plot.

145

146 **Peak year of the forest biomass carbon sink under different SSPs assuming no harvest and**  
147 **annual age accrual at 1 year per year**

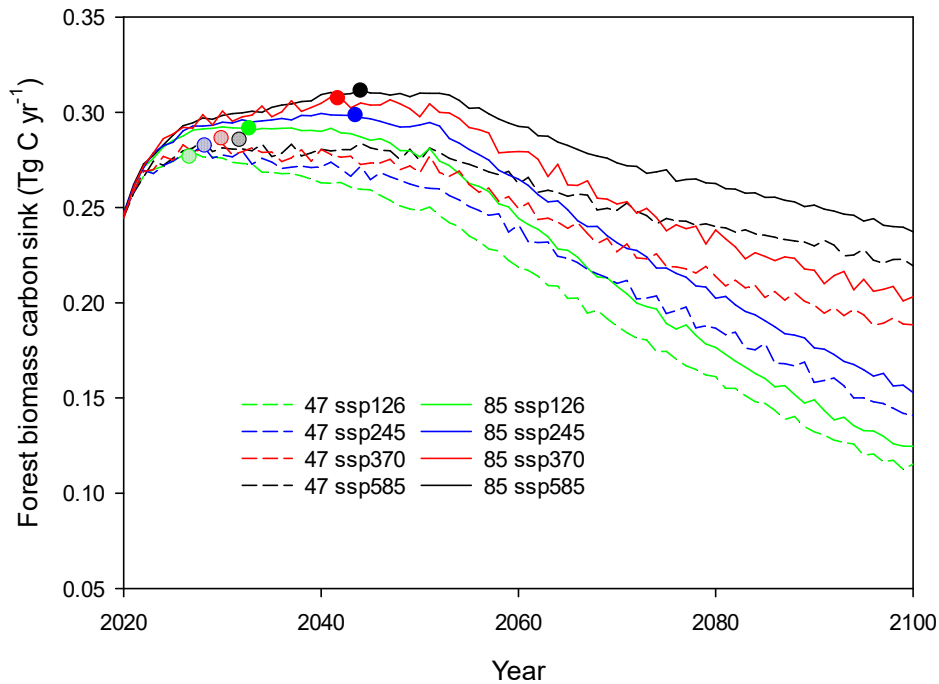

148

149 **Fig. S10. The modeled biomass carbon sink and the year of sink peak under scenarios**  
150 **assuming no harvest and annual forest age accrual at 1 year per year.** Dash line and solid  
151 line indicate the carbon sink under the scenarios of current tree survival rate (47%) and elevated  
152 tree survival rate (85%); ssp126, ssp245, ssp370, and ssp585 indicate simulation of climate and  
153 CO<sub>2</sub> under the scenarios of SSP1-2.6, SSP2-4.5, SSP3-7.0, and SSP5-8.5; Dotted circle and  
154 closed circle indicate the biomass carbon sink peak under the scenarios of current tree survival  
155 rate (47%) and elevated tree survival rate (85%), respectively. Results were derived from group 3  
156 experiments.

157

158

159 **Model simulated biomass carbon removed by wood harvest**  
160

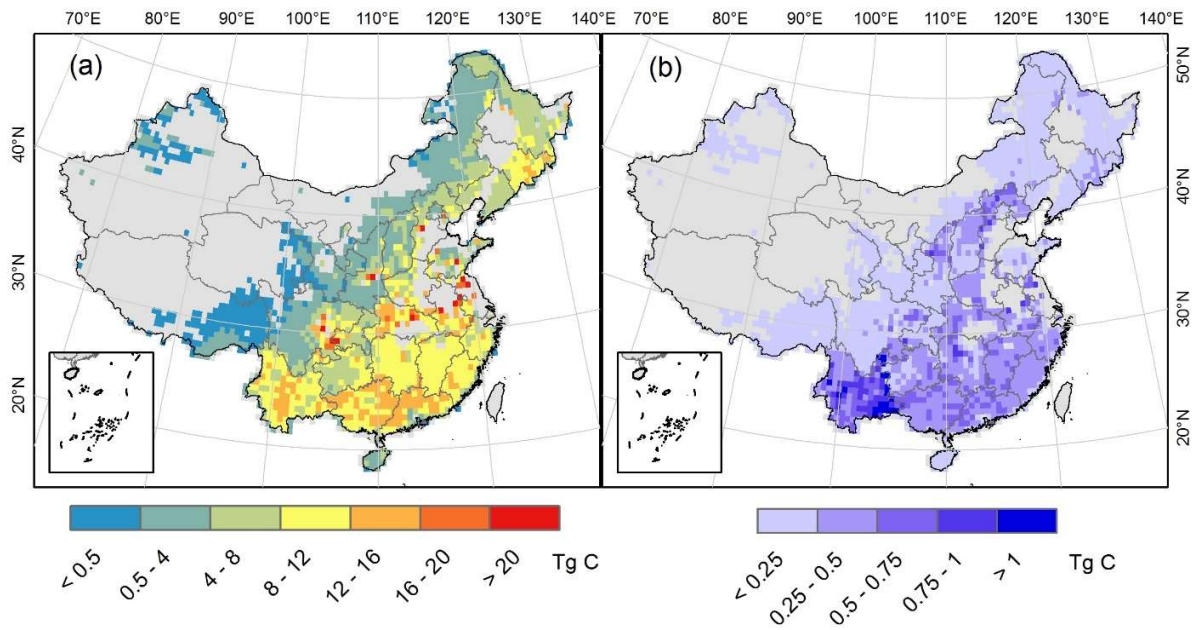

161

162 **Fig. S11. The modeled biomass carbon removed by wood harvest in China during the**  
163 **period 2020-2100. Panel a: average of wood harvest; panel b: standard deviation of the harvest**  
164 **wood; Unit: Tg C per grid cell. Results were derived from group 1 experiments.**

165

166

167 **Model simulated forest biomass carbon stock in 2020, 2060, and 2100**

168

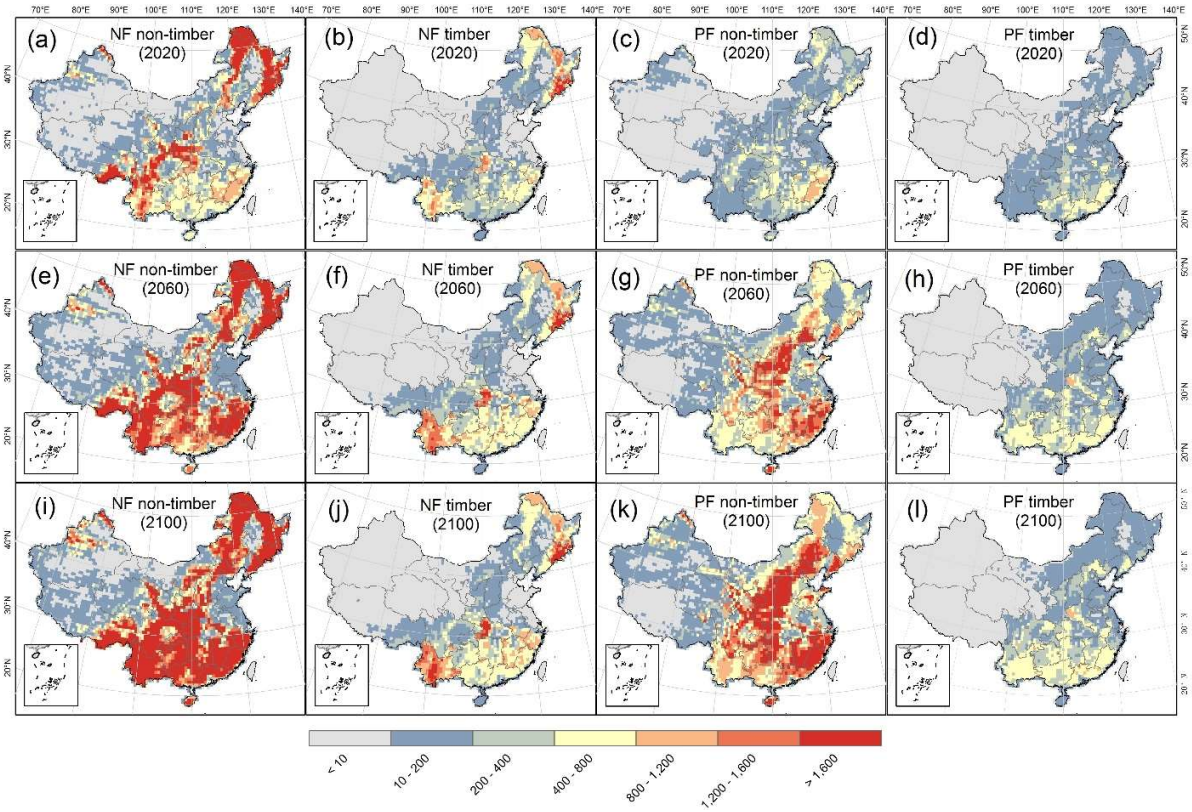

169

170 **Fig. S12. The projected biomass carbon stock in China's forests.** NF non-timber, NF timber,  
171 PF non-timber, and PF timber indicate non-timber natural forest, timber natural forest, non-  
172 timber planted forest, and timber planted forest; panels a-d, e-h, and i-l indicate the spatial  
173 distribution in 2020, 2060, and 2100, respectively; unit:  $\text{g C m}^{-2}$ . Results were derived from  
174 group 1 experiments.

175

176

177 **Spatial distribution of the changes in model simulated forest biomass carbon stock during**  
178 **the periods of 2020-2060 and 2060-2100**  
179

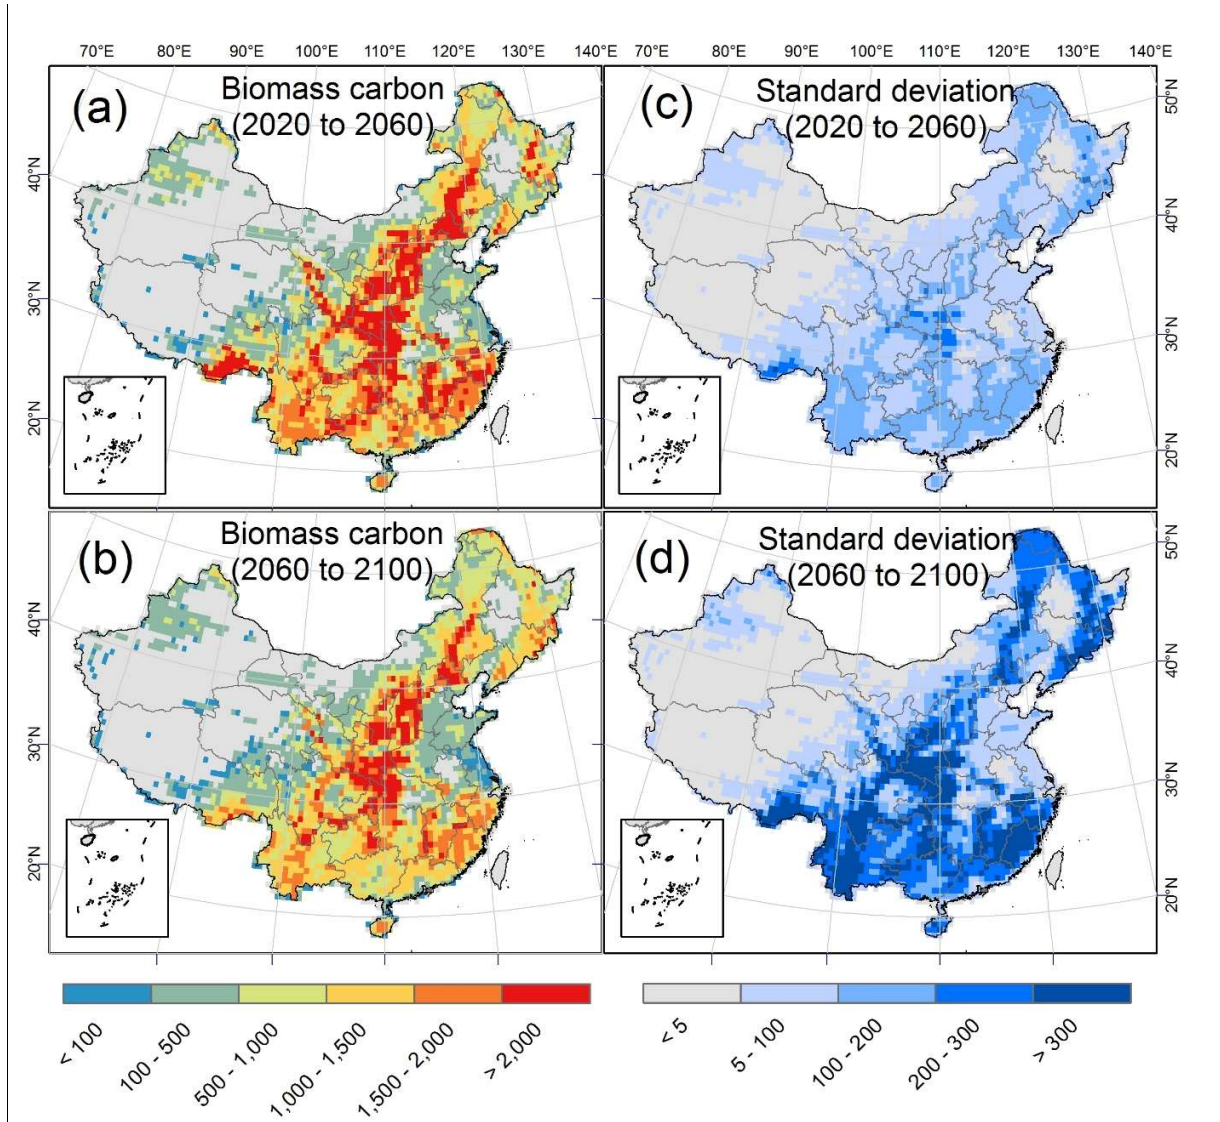

180  
181 **Fig. S13. The modeled biomass carbon stock changes in China.** Panels a-b, and c-d indicate  
182 the biomass carbon stock change and the standard deviation from 2020 to 2060 and from 2060 to  
183 2100, respectively; unit:  $\text{g C m}^{-2}$ . Results were derived from group 1 experiments.

184  
185



186 **Species-specific carbon sink derived from statistical model and process-based model**

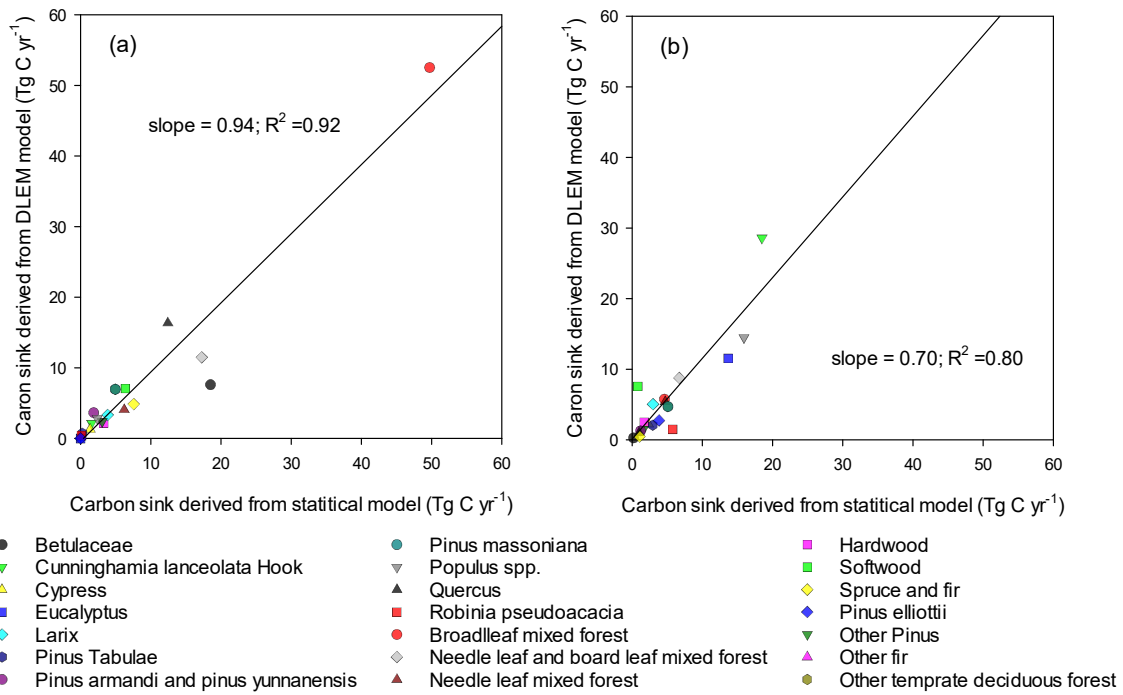

187

188 **Fig. S14. Comparison of carbon sink derived from statistical model and process-based**  
 189 **model at species level in 2020. Panel a: natural forest; Panel b: planted forest.**

190

191 **Spatial distribution of the existing and new forests in China.**  
192

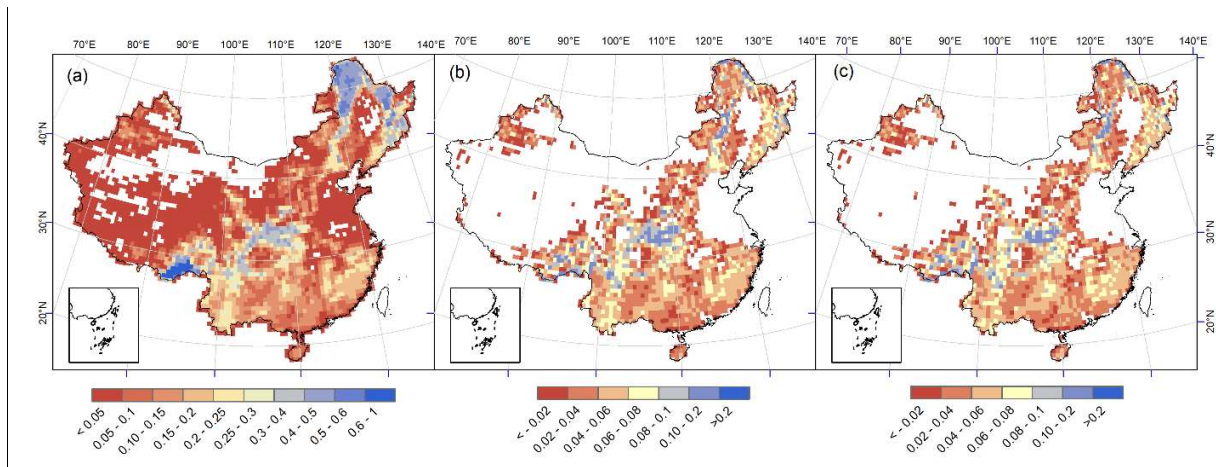

193  
194 **Fig. S15. The distributions of the existing and new forests.** Panel a: forest coverage in 2018;  
195 panel b: new forests from 2018 to 2100 under a 47% tree survival rate; panels c: new forests  
196 from 2018 to 2100 under 85% tree survival rate. The number indicates the coverage percentage  
197 of the forests.  
198

199 Spatial distribution of the habitats suitability index of *Pinus massoniana*, *Pinus sylvestris*,  
200 and *Picea spp.* under climate change.  
201

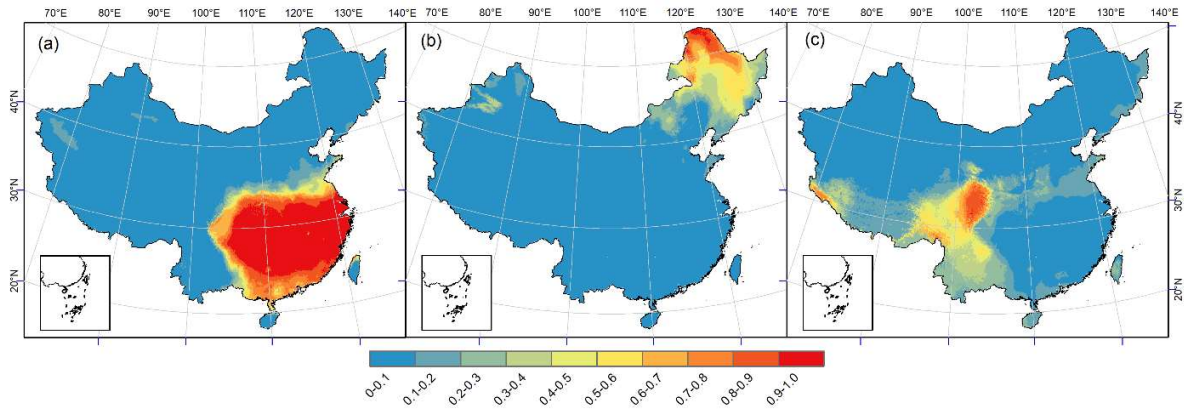

202

203 **Fig. S16. The suitability index distribution maps of (a) *Pinus massoniana*, (b) *Pinus***  
204 ***sylvestris*, and (c) *Picea spp.* in China under future climate change. Suitability index ranges**  
205 **from 0 to 1. Higher value indicates higher suitability for the species.**

206

207 **Spatial distribution of forest management zones**

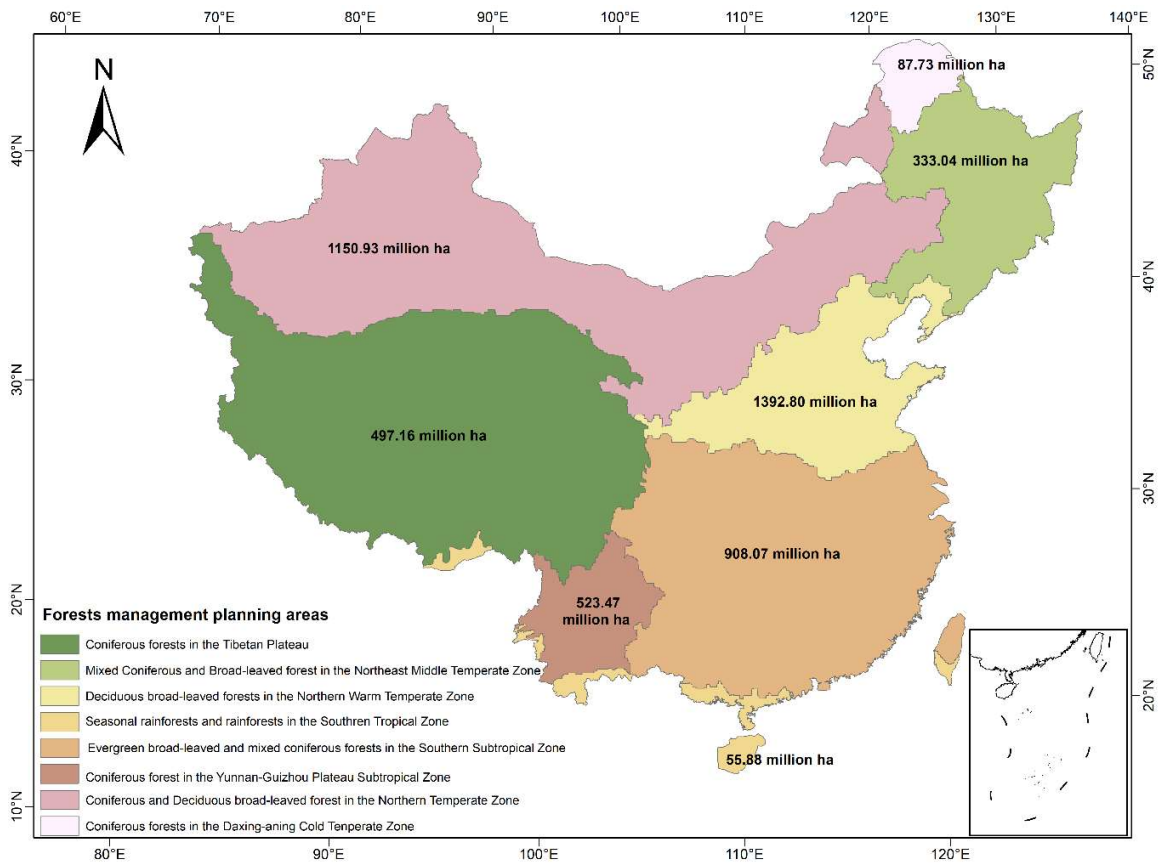

208

209 **Fig. S17. The forest management zones designed by the state forestry administration. The**  
 210 **planned forestation areas were showed in each zones.**

211 **Spatial distribution of tree replacement practice**

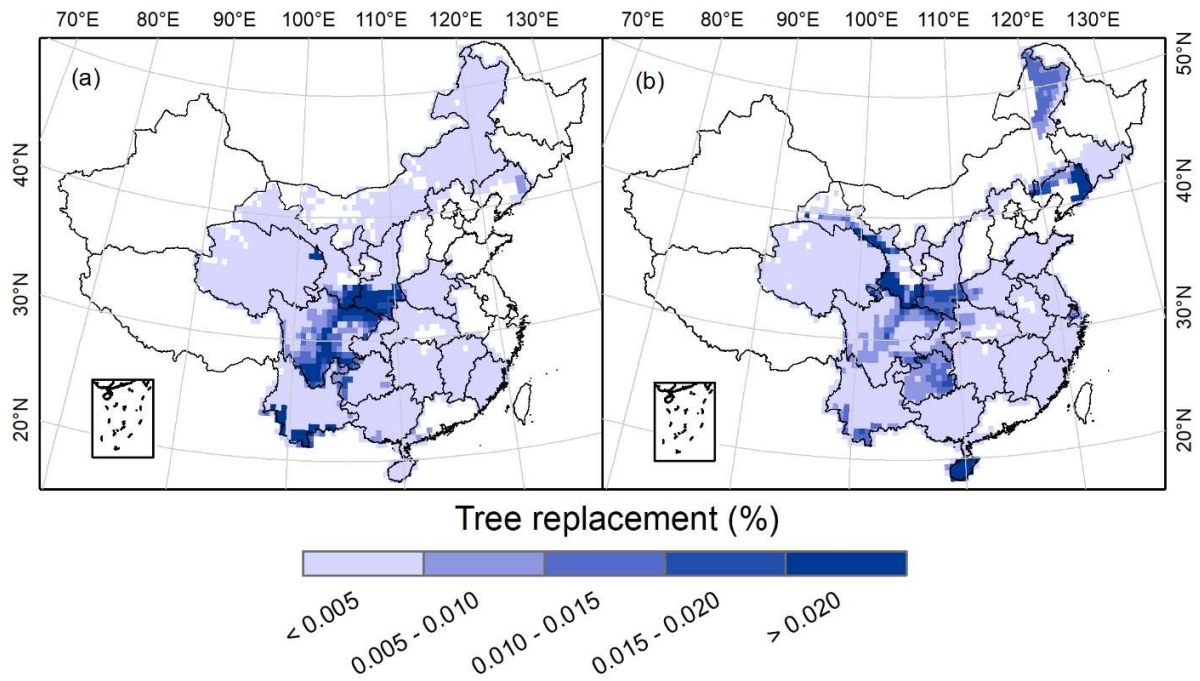

212

213

214 **Fig. S18. Spatial distribution of tree replacement practice.** Panel a: natural forest; Panel b:  
215 planted forest; the value indicates the percent of trees to be replaced in each grid cell.

216

217 **Table S1. Projected carbon stock and sequestration rate reported in China's forests**

| Approach            | Stock (Pg C)                     |            | Year      | Source   | This study  |
|---------------------|----------------------------------|------------|-----------|----------|-------------|
|                     | Initial*                         | Increase** |           |          |             |
| Statistical model   | 16.47                            | 4.16       | 2040s     | (2)      | 4.54        |
|                     | 7.63-10.32                       | 2.34-5.52  | 2050      | (3–6)    | 5.38        |
|                     | 8.79                             | 12.03      | 2063      | (7)      | 7.76        |
| Process-based model | 7.07                             | 13.86      | 2100      | (8)      | 13.6±1.5    |
|                     | 20.79                            | 4.21       | 2100      | (9)      |             |
| Approach            | Sink*** (Pg C yr <sup>-1</sup> ) |            | Period    | Source   | This study  |
| Statistical model   | 0.105-0.236                      |            | 2020-2040 | (2, 3)   | 0.173±0.017 |
|                     | 0.198-0.300                      |            | 2020-2050 | (10, 11) | 0.178±0.016 |
|                     | 0.124-0.253                      |            | 2020-2060 | (12–14)  | 0.179±0.014 |
|                     | 0.20                             |            | 2020-2100 | (15)     | 0.172±0.04  |
| Process-based model | 0.106-0.209                      |            | 2020-2100 | (8, 9)   | 0.172±0.04  |

218 \*Initial carbon stock in 2020; \*\*Carbon stock increment from 2020 to the last year/decade  
 219 reported. Carbon stock Increment in Zhang et al (2022) is abnormally high due to unrealistic  
 220 increase of forest area; \*\*\*Carbon sinks of the periods between 2020 and the last reported year  
 221 were listed.

222  
 223

224 **Table S2. Biomass expansion factor (BEF) and its parameters for China's major tree**  
 225 **species. (BEF =  $a + b/x$ , where  $a$  and  $b$  are constant,  $x$  is mean stock volume per hectare).**

| Forest type                                                | Parameters |         | Reference |
|------------------------------------------------------------|------------|---------|-----------|
|                                                            | a          | b       |           |
| <i>Abies</i> spp.                                          | 0.5519     | 48.861  | (16)      |
| <i>Picea</i> spp.                                          | 0.5519     | 48.861  | (16)      |
| <i>Tsuga</i> spp.                                          | 0.4158     | 41.3318 | (17)      |
| <i>Keteleeria</i>                                          | 0.4158     | 41.3318 | (17)      |
| <i>Larix</i> spp.                                          | 0.6096     | 33.806  | (16)      |
| <i>Pinus koraiensis</i>                                    | 0.5723     | 16.4890 | (16)      |
| <i>Pinus sylvestris</i>                                    | 1.1120     | 2.6951  | (16)      |
| <i>Pinus densiflora</i>                                    | 1.0945     | 2.004   | (16)      |
| <i>Pinus thunbergii</i>                                    | 0.8200     | 16.414  | (18)      |
| <i>Pinus tabulae</i>                                       | 0.869      | 9.1212  | (16)      |
| <i>Pinus armandii</i>                                      | 0.5856     | 18.7440 | (16)      |
| <i>Pinus massoniana</i>                                    | 0.5034     | 20.5470 | (16)      |
| <i>Pinus yunnanensis</i>                                   | 0.5034     | 20.5470 | (16)      |
| <i>Pinus kesiya</i>                                        | 0.5101     | 1.0451  | (16)      |
| <i>Pinus densata</i>                                       | 0.8100     | 11.892  | (18)      |
| Foreign pine (other pines introduced from other countries) | 0.5292     | 25.087  | (16)      |
| <i>Pinus elliottii</i>                                     | 0.6800     | 19.7590 | (18)      |
| <i>Pinus taiwanensis</i>                                   | 0.5168     | 33.2378 | (16)      |
| Other pines and conifer forests                            | 0.5292     | 25.087  | (16)      |
| <i>Cunninghamia lanceolata</i>                             | 0.4652     | 19.141  | (16)      |
| <i>Cryptomeria</i>                                         | 0.3491     | 39.816  | (16)      |
| <i>Metasequoia glyptostroboides</i>                        | 0.4158     | 41.3318 | (19)      |
| <i>Cupressus funebris</i> Endl                             | 0.8893     | 7.3965  | (16)      |
| <i>Quercus</i> spp.                                        | 1.1453     | 8.5473  | (17)      |
| <i>Betula</i>                                              | 1.0687     | 10.237  | (16)      |

|                                         |        |        |      |
|-----------------------------------------|--------|--------|------|
| <i>Betula platyphylla</i>               | 1.3300 | -2.881 | (18) |
| <i>Betula costata</i>                   | 0.9300 | 16.459 | (18) |
| <i>Fraxinus mandshurica</i>             | 0.7564 | 8.3103 | (20) |
| <i>Juglans mandshurica</i>              | 0.7564 | 8.3103 | (20) |
| <i>Cinnamomum longipaniculatum</i>      | 1.0357 | 8.0591 | (17) |
| <i>Phoebe zhennan</i>                   | 1.0357 | 8.0591 | (17) |
| <i>Ulmus</i>                            | 0.7564 | 8.3103 | (20) |
| <i>Robinia pseudoacacia</i>             | 0.7564 | 8.3103 | (21) |
| <i>Schima</i>                           | 0.9200 | 19.808 | (18) |
| Other hardwood broadleaf species        | 0.9600 | 29.083 | (18) |
| <i>Tilia tuan</i>                       | 0.6800 | 54.484 | (18) |
| <i>Sassafras</i>                        | 0.9788 | 5.3764 | (16) |
| <i>Populus</i> spp.                     | 0.4969 | 26.973 | (16) |
| <i>Salix babylonica</i>                 | 0.5100 | 44.003 | (18) |
| <i>Eucalyptus</i> spp.                  | 0.8873 | 4.5539 | (16) |
| <i>Acacia yunnanensis</i>               | 0.8100 | 10.371 | (18) |
| <i>Casuarina</i>                        | 0.7441 | 3.2377 | (16) |
| Other softwood broadleaf forests        | 0.6200 | 33.931 | (18) |
| Mixed Needle-leaf forests               | 0.5292 | 25.087 | (16) |
| Mixed Broadleaf forests                 | 0.6255 | 8.3103 | (17) |
| Mixed Needle-leaf and broadleaf forests | 0.8136 | 18.466 | (17) |

226  
227



**Table S3. Biomass-carbon conversion coefficients for different species**

| Forest type                         | Coefficient | Reference | Forest type                             | Coefficient | Reference |
|-------------------------------------|-------------|-----------|-----------------------------------------|-------------|-----------|
| <i>Abies</i> spp.                   | 0.4990      | (16)      | <i>Quercus</i> spp.                     | 0.5004      | (17)      |
| <i>Picea</i> spp.                   | 0.5208      | (16)      | <i>Butula</i>                           | 0.4914      | (16)      |
| <i>Tsuga</i> spp.                   | 0.5022      | (17)      | <i>Betula platyphylla</i>               | 0.4914      | (18)      |
| <i>Keteleeria</i>                   | 0.5207      | (17)      | <i>Betula costata</i>                   | 0.4914      | (18)      |
| <i>Larix</i> spp.                   | 0.5211      | (16)      | <i>Fraxinus mandshurica</i>             | 0.4827      | (20)      |
| <i>Pinus koraiensis</i>             | 0.5113      | (16)      | <i>Juglans mandshurica</i>              | 0.4827      | (20)      |
| <i>Pinus sylvestris</i>             | 0.5223      | (16)      | <i>Cinnamomum longipaniculatum</i>      | 0.4916      | (17)      |
| <i>Pinus densiflora</i>             | 0.5141      | (17)      | <i>Phoebe zhennan</i>                   | 0.503       | (17)      |
| <i>Pinus thunbergii</i>             | 0.5146      | (18)      | <i>Ulmus</i>                            | 0.5000      | (20)      |
| <i>Pinus tabulae</i>                | 0.5207      | (16)      | <i>Robinia pseudoacacia</i>             | 0.5000      | (21)      |
| <i>Pinus armandii</i>               | 0.5225      | (16)      | <i>Schima</i>                           | 0.5000      | (18)      |
| <i>Pinus massoniana</i>             | 0.4596      | (16)      | Other hardwood and broadleaf forests    | 0.4834      | (18)      |
| <i>Pinus yunnanensis</i>            | 0.5113      | (16)      | <i>Tilia tuan</i>                       | 0.4392      | (18)      |
| <i>Pinus kesiya</i>                 | 0.5224      | (17)      | <i>Sassafras</i>                        | 0.4848      | (16)      |
| <i>Pinus densata</i>                | 0.5009      | (18)      | <i>Populus</i> spp.                     | 0.4956      | (16)      |
| <i>Pinus elliotii</i>               | 0.5000      | (18)      | <i>Eucalyptus</i> spp.                  | 0.5253      | (16)      |
| <i>Pinus taiwanensis</i>            | 0.5000      | (16)      | <i>Acacia yunnanensis</i>               | 0.500       | (18)      |
| Other foreign <i>Pinus</i>          | 0.5000      | (16)      | <i>Salix babylonica</i>                 | 0.5000      | (18)      |
| Other pines and conifer forests     | 0.5000      | (16)      | <i>Casuarina</i>                        | 0.4980      | (17)      |
| <i>Cunninghamia lanceolata</i>      | 0.5201      | (16)      | Other softwood and broadleaf forests    | 0.4956      | (18)      |
| <i>Cryptomeria</i>                  | 0.5235      | (16)      | Needle-leaf mixed forests               | 0.5111      | (16)      |
| <i>Metasequoia glyptostroboides</i> | 0.5013      | (19)      | Broadleaf mixed forests                 | 0.4900      | (17)      |
| <i>Cupressus funebris</i> Endl      | 0.5034      | (16)      | Needle-leaf and broadleaf mixed forests | 0.5009      | (17)      |

**Table S4. The tree species and the number of forest site-records (plots) used in this study**

|                             | Natural forest                                |                    | Planted forest                                              |             |
|-----------------------------|-----------------------------------------------|--------------------|-------------------------------------------------------------|-------------|
|                             | species                                       | Sample size        | species                                                     | Sample size |
| Needle-<br>leaf forest      | <i>Abies</i>                                  | 3243               | <i>Abies</i>                                                | 38          |
|                             | <i>Cryptomeria fortunei</i>                   | 22                 | <i>Cryptomeria fortunei</i>                                 | 403         |
|                             | <i>Cunninghamia lanceolata</i>                | 3269               | <i>Cunninghamia lanceolata</i>                              | 11223       |
|                             | <i>Cupressus</i>                              | 4153               | <i>Cupressus</i>                                            | 1853        |
|                             | <i>Keteleeria</i>                             | 218                | Foreign pines (other pines introduced from other countries) | 276         |
|                             | <i>Larix</i>                                  | 6080               | <i>Larix</i>                                                | 3586        |
|                             | Other pines                                   | 107                | <i>Metasequoia glyptostroboides</i>                         | 207         |
|                             | <i>Picea</i>                                  | 9255               | Other pines                                                 | 172         |
|                             | <i>Pinus armandii</i>                         | 491                | <i>Picea</i>                                                | 482         |
|                             | <i>Pinus densata</i>                          | 3589               | <i>Pinus armandii</i>                                       | 510         |
|                             | <i>Pinus densiflora</i>                       | 190                | <i>Pinus densata</i>                                        | 28          |
|                             | <i>Pinus kesiya</i> var. <i>langbiamensis</i> | 399                | <i>Pinus densiflora</i>                                     | 143         |
|                             | <i>Pinus koraiensis</i>                       | 79                 | <i>Pinus elliottii</i>                                      | 842         |
|                             | <i>Pinus massoniana</i>                       | 10942              | <i>Pinus kesiya</i> var. <i>langbiamensis</i>               | 80          |
|                             | <i>Pinus sylvestris</i>                       | 215                | <i>Pinus koraiensis</i>                                     | 256         |
|                             | <i>Pinus tabulaeformis</i>                    | 1788               | <i>Pinus massoniana</i>                                     | 4815        |
|                             | <i>Pinus taiwanensis</i>                      | 116                | <i>Pinus sylvestris</i>                                     | 412         |
|                             | <i>Pinus yunnanensis</i>                      | 4560               | <i>Pinus tabulaeformis</i>                                  | 2928        |
| <i>Tsuga</i>                | 122                                           | <i>Pinus taeda</i> | 69                                                          |             |
|                             |                                               |                    | <i>Pinus taiwanensis</i>                                    | 37          |
|                             |                                               |                    | <i>Pinus thunbergii</i>                                     | 366         |
|                             |                                               |                    | <i>Pinus yunnanensis</i>                                    | 388         |
|                             |                                               |                    | <i>Taxodium ascendens</i>                                   | 26          |
| Broadleaf forest            | <i>Betula</i>                                 | 4149               | <i>Acacia</i>                                               | 221         |
|                             | <i>Betula costata</i>                         | 224                | <i>Betula</i>                                               | 64          |
|                             | <i>Betula platyphylla</i>                     | 5053               | <i>Camphora officinarum</i>                                 | 358         |
|                             | <i>Camphora officinarum</i>                   | 61                 | <i>Casuarina equisetifolia</i>                              | 137         |
|                             | F.J.P *                                       | 180                | <i>Eucalyptus</i>                                           | 2972        |
| <i>Fraxinus mandshurica</i> | 64                                            | <i>Liquidamber</i> | 68                                                          |             |

|              |                                               |       |                                               |       |
|--------------|-----------------------------------------------|-------|-----------------------------------------------|-------|
|              | <i>Juglans mandshurica</i>                    | 332   | <i>Melia azedarach</i>                        | 27    |
|              | <i>Liquidamber</i>                            | 202   | Other hardwood broadleaf species              | 2111  |
|              | Other hardwood broadleaf species              | 7151  | Other softwood broadleaf species              | 1296  |
|              | Other softwood broadleaf species              | 4537  | <i>Paulownia fortunei</i>                     | 335   |
|              | <i>Paulownia fortunei</i>                     | 24    | <i>Populus</i>                                | 13023 |
|              | <i>Phoebe</i>                                 | 86    | <i>Quercus</i>                                | 771   |
|              | <i>Populus</i>                                | 2157  | <i>Robinia pseudoacacia</i>                   | 1453  |
|              | <i>Quercus</i>                                | 19315 | <i>Salix</i>                                  | 453   |
|              | <i>Robinia pseudoacacia</i>                   | 33    | <i>Sassafras</i>                              | 23    |
|              | <i>Salix</i>                                  | 160   | <i>Schima superba</i>                         | 94    |
|              | <i>Schima superba</i>                         | 287   | <i>Ulmus pumila</i>                           | 345   |
|              | <i>Tilia</i>                                  | 669   |                                               |       |
|              | <i>Ulmus pumila</i>                           | 605   |                                               |       |
|              | Mixed broadleaf forest (MBF)                  | 41675 | Mixed broadleaf forest (MBF)                  | 1978  |
| Mixed forest | Mixed needle-leaf and broadleaf forest (MNBF) | 8229  | Mixed needle-leaf and broadleaf forest (MNBF) | 6777  |
|              | Mixed needle-leaf forest (MNF)                | 3198  | Mixed needle-leaf forest (MNF)                | 1889  |

\*F.J.P denotes the abbreviation of *Fraxinus mandshurica*, *Juglans mandshurica* and *Phellodendrom amurense*. These three tree species were reported together.

**Table S5. Experiments designed for model simulations**

| Group | Abbreviation | Drivers/settings        |              |               |                  |                             |
|-------|--------------|-------------------------|--------------|---------------|------------------|-----------------------------|
|       |              | Tree survival in new PF | Wood harvest | Rotation age* | Tree replacement | Climate and CO <sub>2</sub> |
| 1     | S1           | 47%                     | Yes          | Regular       | No               | SSP126                      |
|       | S2           | 47%                     | Yes          | Regular       | No               | SSP245                      |
|       | S3           | 47%                     | Yes          | Regular       | No               | SSP370                      |
|       | S4           | 47%                     | Yes          | Regular       | No               | SSP585                      |
|       | S5           | 85%                     | Yes          | Regular       | No               | SSP126                      |
|       | S6           | 85%                     | Yes          | Regular       | No               | SSP245                      |
|       | S7           | 85%                     | Yes          | Regular       | No               | SSP370                      |
|       | S8           | 85%                     | Yes          | Regular       | No               | SSP585                      |
| 2     | S9           | 47%                     | Yes          | Regular+5N    | No               | SSP126                      |
|       | S10          | 47%                     | Yes          | Regular+5N    | No               | SSP245                      |
|       | S11          | 47%                     | Yes          | Regular+5N    | No               | SSP370                      |
|       | S12          | 47%                     | Yes          | Regular+5N    | No               | SSP585                      |
|       | S13          | 47%                     | Yes          | Regular       | Yes              | SSP126                      |
|       | S14          | 47%                     | Yes          | Regular       | Yes              | SSP245                      |
|       | S15          | 47%                     | Yes          | Regular       | Yes              | SSP370                      |
|       | S16          | 47%                     | Yes          | Regular       | Yes              | SSP585                      |
|       | S17          | 47%                     | Yes          | Regular+5N    | Yes              | SSP126                      |
|       | S18          | 47%                     | Yes          | Regular+5N    | Yes              | SSP245                      |
|       | S19          | 47%                     | Yes          | Regular+5N    | Yes              | SSP370                      |
|       | S20          | 47%                     | Yes          | Regular+5N    | Yes              | SSP585                      |
|       | S21          | 85%                     | Yes          | Regular+5N    | No               | SSP126                      |
|       | S22          | 85%                     | Yes          | Regular+5N    | No               | SSP245                      |
|       | S23          | 85%                     | Yes          | Regular+5N    | No               | SSP370                      |
|       | S24          | 85%                     | Yes          | Regular+5N    | No               | SSP585                      |

|     |     |     |     |            |     |               |
|-----|-----|-----|-----|------------|-----|---------------|
|     | S25 | 85% | Yes | Regular    | Yes | SSP126        |
|     | S26 | 85% | Yes | Regular    | Yes | SSP245        |
|     | S27 | 85% | Yes | Regular    | Yes | SSP370        |
|     | S28 | 85% | Yes | Regular    | Yes | SSP585        |
|     | S29 | 85% | Yes | Regular+5N | Yes | SSP126        |
|     | S30 | 85% | Yes | Regular+5N | Yes | SSP245        |
|     | S31 | 85% | Yes | Regular+5N | Yes | SSP370        |
|     | S32 | 85% | Yes | Regular+5N | Yes | SSP585        |
| 3   | S33 | 47% | No  | -          | No  | Fixed at 2020 |
|     | S34 | 85% | No  | -          | No  | Fixed at 2020 |
| 4** | S35 | 47% | Yes | Regular    | No  | SSP126        |
|     | S36 | 47% | Yes | Regular    | No  | SSP245        |
|     | S37 | 47% | Yes | Regular    | No  | SSP370        |
|     | S38 | 47% | Yes | Regular    | No  | SSP585        |
|     | S39 | 85% | Yes | Regular    | No  | SSP126        |
|     | S40 | 85% | Yes | Regular    | No  | SSP245        |
|     | S41 | 85% | Yes | Regular    | No  | SSP370        |
|     | S42 | 85% | Yes | Regular    | No  | SSP585        |

\*'Regular' in rotation age indicate the wood harvest rotation age is species-based obtained from the State Forestry Administration of China (i.e., Regulations for age-class and age-group division of main tree-species), while 'Regular+5N' indicate the harvest age is postponed by 5\*N years after key year (i.e. year that timber forest shows the largest carbon source), and N is 1, 2, or 3; in total of 56 experiments (i.e. 7 management scenarios × 2 tree survival rate scenarios × 4 SSPs) were conducted in group 2; nitrogen deposition was fixed since 2015, because a former study revealed that overall nitrogen deposition has been stabilized due to improved agricultural and environmental policies (22). \*\* Group 4 was designed similar as group 1 but the land use and cover change was fixed at 2020.

**Table S6. Harvest age of different tree species/species groups**

| Tree species/species group               | Natural forest |        | Planted forest |       |
|------------------------------------------|----------------|--------|----------------|-------|
|                                          | Age1*          | Age2** | Age1           | Age2  |
| <i>Pinus massoniana</i>                  | 37             | 51     | 26             | 36    |
| <i>Cunninghamia lanceolata</i>           | 19             | 26     | 19             | 26    |
| <i>Eucalyptus</i>                        | 12             | 16     | 12             | 16    |
| <i>Populus</i>                           | 30             | 41     | 14             | 18.5  |
| <i>Larix</i>                             | 67             | 91     | 30             | 41    |
| <i>Pinus tabulaeformis</i>               | 37             | 51     | 26             | 36    |
| <i>Cupressus</i>                         | 74             | 101    | 45             | 61    |
| <i>Pinus elliotii</i>                    | 19             | 26     | 19             | 26    |
| <i>Robinia pseudoacacia</i>              | 6              | 18.5   | 6              | 18.5  |
| Other <i>Pinus</i>                       | 37             | 51     | 26             | 36    |
| Mixed broadleaf forest                   | 36             | 48.5   | 36             | 48.5  |
| Other softwood broadleaf species         | 34             | 46     | 20             | 27.25 |
| Other hardwood broadleaf species         | 37             | 51     | 26             | 36    |
| Mixed needle-leaf and broadleaf forest   | 45             | 61     | 25             | 34.75 |
| Mixed needle-leaf forest                 | 29             | 38.5   | 23             | 31    |
| <i>Quercus</i>                           | 44             | 60     | 36             | 50    |
| <i>Abies, Picea</i>                      | 59             | 81     | 37             | 51    |
| <i>Pinus armandii, Pinus yunnanensis</i> | 67             | 91     | 30             | 41    |
| Economic forests                         | 26             | 36     | 26             | 36    |
| Bamboo                                   | 7              | 10     | 7              | 10    |
| <i>Betula</i>                            | 20             | 55     | 40             | 36    |
| Other temperate deciduous forest species | 30             | 41     | 30             | 41    |
| Other fir species                        | 59             | 80     | 59             | 80    |

\*Age1: the age at the peak of the instantaneous growth rate; \*\*Age2: the harvest age, which is also the peak of the accumulated growth rate (i.e. the average of instantaneous growth rate).

**Table S7. Parameter  $a$  of different tree species/species groups in the logistic equation of age factor**

| <b>Tree species/species group</b>        | <b>Natural forest</b> | <b>Planted forest</b> |
|------------------------------------------|-----------------------|-----------------------|
| <i>Pinus massoniana</i>                  | 0.15                  | 0.05                  |
| <i>Cunninghamia lanceolata</i>           | 0.05                  | 0.25                  |
| <i>Eucalyptus</i>                        | 0.05                  | 0.05                  |
| <i>Populus</i>                           | 0.05                  | 0.05                  |
| <i>Larix</i>                             | 0.05                  | 0.20                  |
| <i>Pinus tabulaeformis</i>               | 0.05                  | 0.05                  |
| <i>Cupressus</i>                         | 0.05                  | 0.25                  |
| <i>Pinus elliotii</i>                    | 0.05                  | 0.05                  |
| <i>Robinia pseudoacacia</i>              | 0.05                  | 0.05                  |
| Other <i>Pinus</i>                       | 0.05                  | 0.05                  |
| Mixed broadleaf forest                   | 0.35                  | 0.35                  |
| Other softwood broadleaf species         | 0.35                  | 0.35                  |
| Other hardwood broadleaf species         | 0.05                  | 0.05                  |
| Mixed needle-leaf and broadleaf forest   | 0.05                  | 0.25                  |
| Mixed needle-leaf forest                 | 0.25                  | 0.15                  |
| <i>Quercus</i>                           | 0.05                  | 0.05                  |
| <i>Abies, Picea</i>                      | 0.20                  | 0.05                  |
| <i>Pinus armandii, Pinus yunnanensis</i> | 0.05                  | 0.15                  |
| Economic forests                         | 0.05                  | 0.05                  |
| Bamboo                                   | 0.05                  | 0.05                  |
| <i>Betula</i>                            | 0.05                  | 0.05                  |
| Other temperate deciduous forest species | 0.05                  | 0.05                  |
| Other fir species                        | 0.05                  | 0.05                  |

**Table S8 Forest age increment in non-timber forests with mixed tree species**

| Tree species/species group*            | Harvest age          |       |                      |       |
|----------------------------------------|----------------------|-------|----------------------|-------|
|                                        | Natural forest       |       | Planted forest       |       |
|                                        | Age accrual per year | Std   | Age accrual per year | Std   |
| Mixed broadleaf forest                 | 0.848                | 0.358 | 0.788                | 0.284 |
| Other softwood broadleaf species       | 0.924                | 0.154 | 0.872                | 0.230 |
| Other hardwood broadleaf species       | 0.828                | 0.292 | 0.890                | 0.488 |
| Mixed needle-leaf and broadleaf forest | 0.790                | 0.302 | 0.794                | 0.250 |
| Mixed needle-leaf forest               | 0.832                | 0.210 | 0.820                | 0.258 |



**Table S9. Tree species replacement plan**

| Management zone                                                                | Inappropriate species               | Area (km <sup>2</sup> ) | Replacement species          |
|--------------------------------------------------------------------------------|-------------------------------------|-------------------------|------------------------------|
| Needleleaf forests of cold temperate zone                                      | <i>Pinus tabulae</i>                | 947.2                   | <i>Larix</i>                 |
|                                                                                | <i>Cupressus funebris</i> Endl      | 52.5                    |                              |
|                                                                                | <i>Robinia pseudoacacia</i>         | 49.2                    |                              |
| Needleleaf&broadleaf mixed forests of mid-temperate zone                       | <i>Pinus tabulae</i>                | 3039.3                  | <i>Larix</i>                 |
|                                                                                | <i>Cupressus funebris</i> Endl      | 94.1                    |                              |
|                                                                                | <i>Pinus elliottii</i>              | 15.9                    | <i>Pinus koraiensis</i>      |
|                                                                                | <i>Robinia pseudoacacia</i>         | 751.4                   | <i>Larix</i>                 |
| Deciduous broadleaf forests of warm-temperate zone                             | <i>Pinus massoniana</i>             | 372.7                   | <i>Pinus koraiensis</i>      |
|                                                                                | <i>Cunninghamia lanceolata</i> Hook | 104.4                   |                              |
|                                                                                | <i>Pinus elliottii</i>              | 35.8                    | <i>Larix</i>                 |
| Broadleaf evergreen and needleleaf-broadleaf mixed forests of subtropical zone | <i>Larix</i>                        | 1479.8                  | BMF species*                 |
|                                                                                | <i>Pinus tabulae</i>                | 4089.9                  |                              |
|                                                                                | <i>Betula</i>                       | 4206.1                  |                              |
|                                                                                | Other firs                          | 4474.0                  |                              |
| Tropical and seasonal tropical zone                                            | <i>Populus</i>                      | 24.4                    | BMF species                  |
|                                                                                | <i>Larix</i>                        | 5.5                     |                              |
|                                                                                | <i>Cupressus funebris</i> Endl      | 63.7                    |                              |
|                                                                                | <i>Robinia pseudoacacia</i>         | 0.2                     |                              |
|                                                                                | <i>Quercus</i>                      | 6102.5                  |                              |
|                                                                                | <i>Picea</i>                        | 258.1                   |                              |
|                                                                                | <i>Pinus armandii</i> Franch        | 2795.2                  |                              |
|                                                                                | <i>Betula</i>                       | 91.2                    |                              |
|                                                                                | Other firs                          | 214.6                   |                              |
| Needleleaf forest of subtropical zone                                          | <i>Pinus massoniana</i>             | 1338.9                  | <i>Pinus armandii</i> Franch |
|                                                                                | <i>Pinus tabulae</i>                | 189.2                   |                              |
|                                                                                | <i>Robinia pseudoacacia</i>         | 94.7                    | BMF species                  |
|                                                                                | <i>Betula</i>                       | 1633.4                  |                              |
| Needleleaf and deciduous broadleaf forest of temperate zone                    | <i>Pinus massoniana</i>             | 30.8                    | <i>Larix</i>                 |
|                                                                                | <i>Cunninghamia lanceolata</i> Hook | 7.4                     | <i>Picea</i>                 |
|                                                                                | <i>Cupressus funebris</i> Endl      | 1387.5                  | <i>Larix</i>                 |
|                                                                                | <i>Robinia pseudoacacia</i>         | 24.6                    | BMF species                  |
|                                                                                | <i>Betula</i>                       | 5.1                     |                              |
| Needleleaf forest of Tibetan Plateau                                           | <i>Pinus massoniana</i>             | 1454.5                  | <i>Picea</i>                 |
|                                                                                | <i>Cunninghamia lanceolata</i> Hook | 590.8                   | <i>Picea</i>                 |
|                                                                                | <i>Pinus tabulae</i>                | 1415.2                  | <i>Pinus armandii</i> Franch |
|                                                                                | <i>Pinus elliottii</i>              | 29.5                    | <i>Pinus densata</i>         |
|                                                                                | <i>Robinia pseudoacacia</i>         | 3902.0                  | BMF species                  |

\*BMF species indicates Broadleaf mixed forest species, which are indigenous species of southern China, these species were grouped into one type in model simulations.

## Supplementary References

1. Ministry of Agriculture and Forestry of China, *Timber Volume Table of China* (Standards Press of China, 1978).
2. Y. Yao, S. Piao, T. Wang, Future biomass carbon sequestration capacity of Chinese forests. *Sci. Bull.* **63**, 1108–1117 (2018).
3. Q. Li, J.-H. Zhu, Y. Feng, W.-F. Xiao, Carbon storage and carbon sequestration potential of the forest in China. *Clim. Chang. Res.* **14**, 287–294 (2018).
4. B. Xu, Z. Di Guo, S. L. Piao, J. Y. Fang, Biomass carbon stocks in China's forests between 2000 and 2050: A prediction based on forest biomass-age relationships. *Sci. China Life Sci.* **53**, 776–783 (2010).
5. H. Hu, S. Wang, Z. Guo, B. Xu, J. Fang, The stage-classified matrix models project a significant increase in biomass carbon stocks in China's forests between 2005 and 2050. *Sci. Rep.* **5**, 11203 (2015).
6. Z. Qiu, Z. Feng, Y. Song, M. Li, P. Zhang, Carbon sequestration potential of forest vegetation in China from 2003 to 2050: Predicting forest vegetation growth based on climate and the environment. *J. Clean. Prod.* **252**, 119715 (2020).
7. Y. Zhang, X. Li, Y. Wen, Forest carbon sequestration potential in China under the background of carbon emission peak and carbon neutralization. *J. Beijing For. Univ.* **44**, 38–47 (2022).
8. L. Zhou, *et al.*, Carbon dynamics in woody biomass of forest ecosystem in China with forest management practices under future climate change and rising CO<sub>2</sub> concentration. *Chinese Geogr. Sci.* **23**, 519–536 (2013).
9. W. M. Ju, J. M. Chen, D. Harvey, S. Wang, Future carbon balance of China's forests under climate change and increasing CO<sub>2</sub>. *J. Environ. Manage.* **85**, 538–562 (2007).
10. N. He, *et al.*, Vegetation carbon sequestration in Chinese forests from 2010 to 2050. *Glob. Chang. Biol.* **23**, 1575–1584 (2017).
11. C. Zhang, *et al.*, Sustained biomass carbon sequestration by China's forests from 2010 to 2050. *Forests* **9**, 689 (2018).
12. S. Piao, C. Yue, J. Ding, Z. Guo, Perspectives on the role of terrestrial ecosystems in the “carbon neutrality” strategy. *Sci. China Earth Sci.* **65**, 1178–1186 (2022).

13. W. Cai, *et al.*, Carbon sequestration of Chinese forests from 2010 to 2060: spatiotemporal dynamics and its regulatory strategies. *Sci. Bull.* **67**, 836–843 (2022).
14. Y. Huang, *et al.*, The role of China’s terrestrial carbon sequestration 2010-2060 in offsetting energy-related CO<sub>2</sub> emissions. *Natl. Sci. Rev.* **9**, nwac057 (2022).
15. H. Xu, C. Yue, Y. Zhang, D. Liu, S. Piao, Forestation at the right time with the right species can generate persistent carbon benefits in China. *Proc. Natl. Acad. Sci. U. S. A.* **120**, e2304988120 (2023).
16. S. L. Piao, *et al.*, The carbon budget of terrestrial ecosystems in East Asia over the last two decades. *Biogeosciences* **9**, 3571–3586 (2012).
17. H. Li, Y. Lei, *Estimation and Evaluation of Forest Biomass Carbon Storage in China* (China Forestry Publishing House, 2010).
18. J. Lu, “Estimation of carbon storage of arbor forest based on the forest resource inventory data,” Beijing Forestry University. (2020).
19. G. Liu, B. Fu, J. Fang, Carbon dynamics of Chinese forests and its contribution to global carbon balance. *Acta Ecol. Sin.* **20**, 733–740 (2000).
20. Q. Yang, Estimating forest carbon storage in Xiuyan County by forest stock volume biomass model. *Green Technol.* **23**, 20–22 (2021).
21. J. Fang, G. Liu, S. Xu, Biomass and net production of forest vegetation in China. *Acta Ecol. Sin.* **16**, 497–508 (1996).
22. G. Yu, *et al.*, Stabilization of atmospheric nitrogen deposition in China over the past decade. *Nat. Geosci.* **12**, 424–429 (2019).
