# Supplementary material for: Maximizing carbon sequestration potential in Chinese forests through optimal management
Source: PubMed Central journal article supplement (PMC11009231; doi:10.1038/s41467-024-47143-5), 2024-04-11
Supplement: 41467_2024_47143_MOESM3_ESM.pdf [file 41467_2024_47143_MOESM3_ESM.pdf]

## **Description of Additional Supplementary Files**

File Name: Supplementary Data 1

Description: equations of the statistical models
